# Supplementary material for: Identification of spikes in continuous ground-based in situ time series of CO 2 , CH 4 and CO: an extended experiment within the European ICOS Atmosphere network
Source: Copernicus journal article supplement (doi:10.5194/amt-16-5977-2023), 2023-12-14
Supplement: Supplementary file 1 [file amt-16-5977-2023-supplement.zip]

Archive with 3 entries (3 files):
- amt-16-5977-2023-supplement-title-page.pdf
- Cristofanellietal_amtd_icos_spikes_SM2_revised_typesetted.pdf
- Cristofanellietal_amtd_icos_spikes_SM1.pdf
