# Supplementary material for: Identification of spikes in continuous ground-based in situ time series of CO 2 , CH 4 and CO: an extended experiment within the European ICOS Atmosphere network
Source: Copernicus journal article supplement (doi:10.5194/amt-16-5977-2023), 2023-12-14
Supplement: Supplementary file 1 [file amt-16-5977-2023-supplement.zip › amt-16-5977-2023-supplement-title-page.pdf]

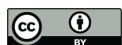

*Supplement of*

**Identification of spikes in continuous ground-based in situ time series of CO<sub>2</sub>, CH<sub>4</sub> and CO: an extended experiment within the European ICOS Atmosphere network**

**Paolo Cristofanelli et al.**

*Correspondence to:* Paolo Cristofanelli ([p.cristofanelli@isac.cnr.it](mailto:p.cristofanelli@isac.cnr.it))

- [amt-16-5977-2023-supplement-title-page.pdf](#)
- [Cristofanellietal\\_amtd\\_icos\\_spikes\\_SM1.pdf](#)
- [Cristofanellietal\\_amtd\\_icos\\_spikes\\_SM2\\_revised\\_typesetted.pdf](#)

The copyright of individual parts of the supplement might differ from the article licence.
